# Supplementary material
Source: HighWire-hosted journal article supplement (https://jnm.snmjournals.org/highwire/filestream/93928/field_highwire_adjunct_files/0/48009_Suppl_Fig_1.pdf)
Supplement: 48009_Suppl_Fig_1.pdf [file 48009_Suppl_Fig_1.pdf]

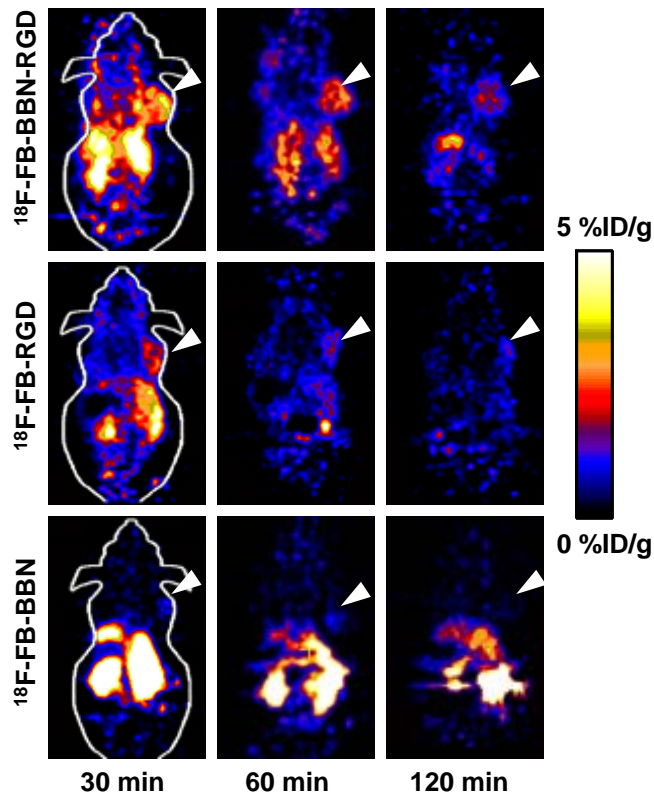

Figure S1. Decay-corrected whole-body coronal microPET images of athymic male nude mice bearing DU-145 tumor at 30, 60, and 120 min after injection of  $^{18}\text{F}$ -FB-BBN-RGD,  $^{18}\text{F}$ -FB-BBN or  $^{18}\text{F}$ -FB-RGD (3.7 MBq [100  $\mu\text{Ci}$ ]). Images shown are 3 min static scans of a single mouse, but is representative for the 3 mice tested in each group. Tumors are indicated by arrows.
